# Supplementary material for: Dose– and time-dependent systemic immune modulation by stereotactic radiotherapy in early-stage lung cancer
Source: Research Square preprint supplement (doi:10.21203/rs.3.rs-1836726/v1), 2022-07-12
Supplement: Supplementary file 1 [file 73fb8175df9b406d4dad3bcc.docx]

**Online Table 1. Patient and treatment characteristics**

|  | Number of patients (%)  or median (range) |
| --- | --- |
| Age (years) | 70 (54-84) |
| Male  Female | 34 (68%)  16 (32%) |
| Tumor localisation  Left upper lobe  Left lower lobe  Right upper lobe  Right lower lobe | 13 (26%)  8 (16%)  19 (38%)  10 (20%) |
| T N M  pTis N0 M0  T1a N0 M0  T1b N0 M0  T1c N0 M0  T2a N0 M0  T2b N0 M0  T3 N0 M0 | 1 (2%)  2 (4%)  16 (32%)  17 (34%)  9 (18%)  3 (6%)  2 (4%) |
| UICC  0  IA1  IA2  IA3  IB  IIA  IIB | 1 (2%)  2 (4%)  16 (32%)  17 (34%)  9 (18%)  3 (6%)  2 (4%) |
| Maximum diameter (mm) | 21 (10-58) |
| FEV1 (lt) | 1.3 (0.34-3.4) |
| COPD  yes  no | 37 (74%)  13 (26%) |
| Total dose (Gy) | 56.25 (50-66) |
| BED (Gy) | 105 (100-162) |
| BED D98% (Gy) | 107 (90-143) |
| BED Dmedian (Gy) | 123 (111-168) |
| BED D2% (Gy) | 134 (122-216) |
| Number of fractions  3  5  8  12 | 22 (44%)  6 (12%)  21 (42%)  1 (2%) |

UICC: *Union for International Cancer Control, COPD:* chronic obstructive pulmonary disease, FEV1: Forced Expiratory Pressure in 1 Second, SCC: squamous cell carcinoma, BED: biological effective dose D:dose
